# Supplementary material
Source: PubMed Central journal article supplement (PMC4908866)
Supplement: d-72-00718-sup1.pdf [file d-72-00718-sup1.pdf]

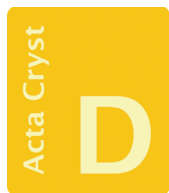

STRUCTURAL  
BIOLOGY

**Volume 72 (2016)**

**Supporting information for article:**

**Crystal structure of a dimerization domain of human caprin-1:  
insights into the assembly of an evolutionarily conserved  
ribonucleoprotein complex containing caprin-1, FMRP and G3BP1**

**Yuhong Wu, Jiang Zhu, Xiaolan Huang and Zhihua Du**

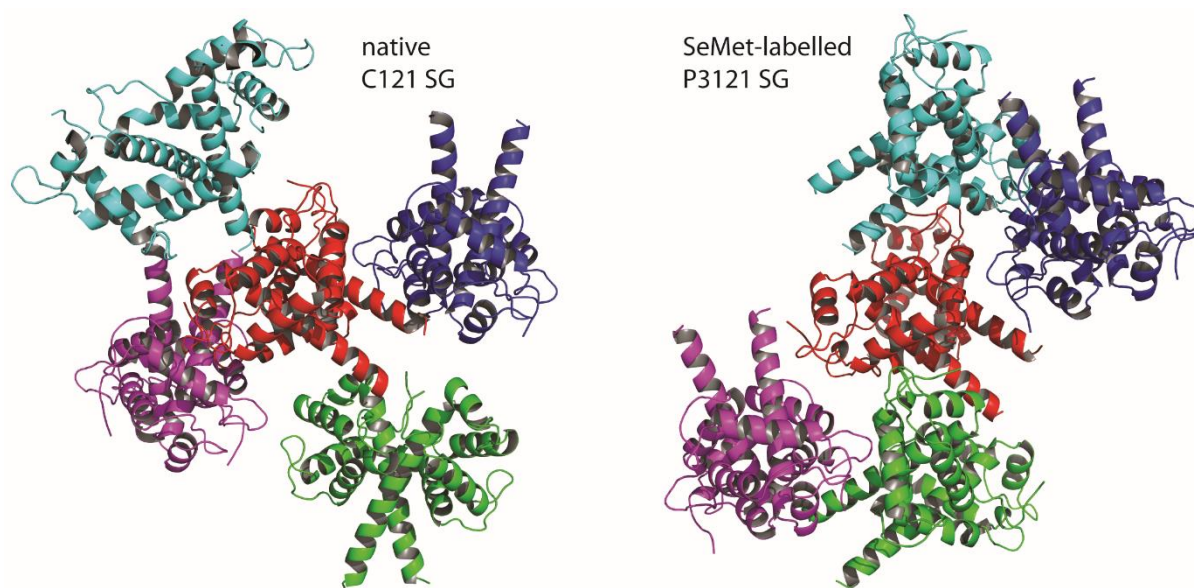

**Figure S1** Different crystal packings in the two different crystal forms of Caprin-1 dimer. Five homodimeric Caprin-1 structures are shown in different colours.
